# Metformin is associated with survival benefit in pancreatic cancer patients with diabetes: a systematic review and meta-analysis

Ping-Ting Zhou<sup>1,\*</sup>, Bo Li<sup>2,\*</sup>, Fu-Rao Liu<sup>1</sup>, Mei-Chao Zhang<sup>1</sup>, Qian Wang<sup>1</sup>, Yan-Yan Li<sup>1</sup>, Ci Xu<sup>1</sup>, Yuan-Hua Liu<sup>3</sup>, Yuan Yao<sup>4</sup>, Dong Li<sup>1</sup>

<sup>1</sup>Department of Oncology, Shanghai Ninth People's Hospital, Shanghai Jiaotong University School of Medicine, Shanghai, China

<sup>2</sup>Department of Bone Tumor Surgery, Changzheng Hospital, Second Military Medical University, Shanghai, China

<sup>3</sup>Department of Chemotherapy, Nanjing Medical University Affiliated Cancer Hospital, Cancer Institute of Jiangsu Province, Nanjing, Jiangsu, China

<sup>4</sup>Department of Radiation Oncology, Shanghai Ninth People's Hospital, Shanghai Jiaotong University School of Medicine, Shanghai, China

\*These authors have contributed equally to this work

**Correspondence to:** Dong Li, email: lidong@shsmu.edu.cn

**Keywords:** metformin, pancreatic cancer, diabetes, overall survival

**Received:** August 29, 2016

**Accepted:** January 24, 2017

**Published:** February 25, 2017

**Copyright:** Zhou et al. This is an open-access article distributed under the terms of the Creative Commons Attribution License (CC-BY), which permits unrestricted use, distribution, and reproduction in any medium, provided the original author and source are credited.

## ABSTRACT

**Background:** Pancreatic cancer is a highly lethal disease with a poor prognosis while metformin has been associated with a decreased risk of pancreatic cancer. Although the benefit of metformin was observed for pancreatic cancer prevention, it is not clear whether it can also affect the survival of pancreatic cancer patients with type 2 diabetes mellitus. A systematic review and meta-analysis was conducted to assess the effect of metformin on the survival of pancreatic cancer patients with type 2 diabetes mellitus.

**Methods:** Two independent authors searched PubMed and Web of science up to 08/07/2016. We assessed studies for eligibility, extracted data, and examined their quality, with the primary outcome as overall survival. We used published hazard ratio (HR) available or estimated based on other survival data. We pooled the data and used a random-effect model to combine direct comparisons from included articles. We also investigated treatment effects by different countries, quality and the time of metformin initiation.

**Results:** We found that there was a relative survival benefit associated with metformin treatment compared with non-metformin treatment in both overall survival (OS) ([HR] 0.84; 95% confidence interval [CI]: 0.73 – 0.96). These associations were also observed in subgroups of Asian countries and high quality articles.

**Conclusions:** Our results support the notion that metformin maybe the best anti-diabetic medicine of choice in patients with pancreatic cancer and concurrent type 2 diabetes mellitus. The perspectives of enhancing survival of pancreatic cancer patients with diabetes mellitus by the use of metformin deserve more attention in future research and clinical practice.

## INTRODUCTION

Pancreatic cancer (PC) is the fifth leading cause of cancer-related death in developed countries [1], and it is projected that the incidence is to increase by 55% from

2010 to 2030 [2]. PC is one of the most lethal types of cancer, with a 5-year survival rate of <5% [3, 4], mainly because of the late detected stage and a shortage of well characterized biomarkers for the disease [5–7]. Smoking is the most common risk factor for PC, and other risk factors

include heavy alcohol consumption, chronic pancreatitis, and dietary/endocrine factors [8]. Recently, several studies have reported that obesity and type 2 diabetes mellitus (DM) are associated with increased incidence for PC [9, 10].

Therapies for diabetes include exogenous insulin, sulfonylureas and metformin. Metformin is the most commonly used therapy for DM worldwide [11]. It works mechanistically by reducing insulin resistance and decreasing hepatic glucose production. Metformin has been associated with a decreased risk of breast cancer [11, 12], gastric cancer [13] and ovarian cancer [14]. Recent epidemiological studies also showed that metformin might decrease the risk of PC incidence [15, 16].

Although the benefit of using metformin was observed with PC prevention, it is not clear whether it can also effect on the survival of PC patients with DM. Since 2009, a growing number of articles focus on the effectiveness of metformin on survival of PC patients with DM, but the results are remarkably inconsistent. Here we conduct a systematic review and meta-analyses of the literature to better understand the effect of metformin on the survival of PC patients with DM.

## RESULTS

### Selection of articles and characteristics

The selection of relevant articles is depicted in the flow chart (Figure 1). Briefly, we first identified 43 trials, of which 31 were excluded because they did not fulfill the inclusion criteria. 12 trials [17–28] were potentially

suitable, but 3 trials [26–28] were eventually excluded because they didn't provide complete information. A total of 9 cohort studies [17–25] were available for inclusion in the quantitative analysis of the survival benefits of metformin for PC patients concurrent with DM, with one study [25] including two comparisons. Finally, 10 comparisons were included in our meta-analysis.

The total number of individuals in the studies was 9,265 patients with PC and DM. 4871 patients received metformin alone or in combination with other anti-diabetes medicine while the rest (4394 patients) received non-metformin treatment such as thiazolidinedione, insulin, sulfonylurea, thiazolidinedione, and dipeptidylpeptidase-4 inhibitors. The characteristics of the studies are summarized in Table 1. Included studies were retrospective cohort design and clinic-based setting. According to the Newcastle-Ottawa Scale (NOS) the quality of 6 studies [17-20, 24, 25] was high.

These studies were conducted in America and Europe (6 studies, 94.7%) [17-19, 22, 24, 25] or in Asia including Japan and Korea (3 studies, 5.3%) [20, 21, 23], without studies from other Continents. The male proportion (54.9%) included in the studies is slightly higher than female, with a mean age of 69±8.8 years. Most studies excluded older people and individuals with clinically significant comorbid conditions. Three studies [17, 22, 25] performed analysis comparing patients who had received metformin before PC diagnosis. Meanwhile, patients in three studies [18, 20, 25] had DM at the time of PC diagnosis. The median follow-up data in the trials were mature, and median follow-up time ranged from within 9.26 months [18] to within 19 months [19].



Figure 1: Flow diagram of study identification.

**Table 1: Characteristics of the studies included in the meta-analysis**

| Study               | Year | Country | Design               | NOS | Sample Size (met/non-met) | OS | Mean flow-up |
|---------------------|------|---------|----------------------|-----|---------------------------|----|--------------|
| Amin et al.         | 2016 | USA     | Cohort               | 7   | 1916(1098/818)            | Y  | NR           |
| Chaiteerakij et al. | 2016 | USA     | Retrospective cohort | 6   | 980(366/614)              | Y  | 9.26 months  |
| Ambe et al.         | 2016 | USA     | Cohort               | 7   | 44(19/25)                 | Y  | 19 months    |
| Lee et al.          | 2015 | Korea   | Retrospective cohort | 6   | 237(117/120)              | Y  | 10.3 months  |
| Choi et al.         | 2015 | Korea   | Cohort               | 4   | 183(56/127)               | Y  | 10.2 months  |
| Hwang et al.        | 2013 | USA     | Retrospective cohort | 5   | 516(247/269)              | Y  | NR           |
| Nakai et al.        | 2013 | Japan   | Retrospective cohort | 3   | 124(8/116)                | Y  | 9.9 months   |
| Sadeghi et al.      | 2012 | USA     | Retrospective cohort | 8   | 302(117/185)              | Y  | 11.4 months  |
| Currie et al.       | 2012 | UK      | Cohort               | 6   | 5016(2843/2173)           | Y  | NR           |

Abbreviations: met, metformin; non-met, non-metformin; NR, not reported.

### Overall and subgroup analysis

The survival analysis was based on 9 trials, 9318 patients, and 657 deaths. When compared with non-metformin treated patients, the pooled HR of death was 0.84 (95% CI, 0.73 to 0.96;  $P$ , 0.01) for metformin users (Figure 2). This corresponds to an absolute survival benefit at 16% with metformin. We next performed subgroup analysis by countries (Asian or Western countries). In the subgroup of Asian countries, metformin was still associated with reduced death risk by fixed model (HR 0.65; 95% CI: 0.52 – 0.80;  $p$  0.830 for heterogeneity;  $I^2$  0%) (Table 2). However, no significant difference was observed in the relative survival benefit with respect to the subgroup of Western countries (HR 0.90 by random model; 95% CI: 0.78 – 1.03;  $p$  0.028 for heterogeneity;  $I^2$  57.6%) (Table 2). Metformin efficacy was found to be significantly superior for PC in the subgroup of 6 high quality studies (HR 0.81; 95% CI: 0.70 – 0.95;  $p$  0.012 for heterogeneity;  $I^2$  63.3%) (Table 2), but in 3 low quality studies benefit was not significant (HR 0.88; 95% CI: 0.60 – 1.29;  $p$  0.067 for heterogeneity;  $I^2$  63.1%) (Table 2). We also performed subgroup analyses to examine the effects of metformin according to timing of metformin initiation. Metformin use before PC diagnose showed no benefit of survival (HR 0.89; 95% CI: 0.83 – 0.96;  $p$  0.02 for heterogeneity;  $I^2$  60.8%) (Table 2).

### Sensitivity analyses and publication bias

There was substantial statistical heterogeneity between studies with an  $I^2$  value of 60.8% ( $I^2$  test for

heterogeneity,  $P$  0.006), which could be explained partly by study location (Western vs. Asian). No evident of publication bias was discovered by Begg's and Egger's tests for total mortality (Figure 3). All  $p$  values for a two-sided test were  $>0.1$ . In addition, visual inspection of the funnel plot did not reveal remarkable asymmetry. We also carried out sensitivity analysis and found that omission of any study at a time did not alter the pooled results even if the most influential study was omitted.

## DISCUSSION

To our knowledge, our meta-analysis is the first quantitative study to inspect the association between metformin treatment and survival of patients with PC and type 2 DM concurrently. Our study included 9318 patients from 9 independently published investigations, and the pooled results provided evidence that the use of metformin is associated with improved OS in the treatment of patients with PC and type 2 DM.

Pancreatic cancer can lead to DM by destroying islet cells or by causing peripheral insulin resistance. Islet amyloid polypeptide, the concentrations of which are elevated in PC patients with DM, appears to be responsible for the insulin resistance [29]. Strikingly, nearly 60% of PC patients with new-onset of DM, who underwent pancreatico-duodenectomy, had resolution of their DM following tumor resection [30–32]. These results suggest that new-onset DM in PC patients is likely a consequence of the cancer. On the other hand, it has been reported that about 1% of DM patients being diagnosed within 3 years

were diagnosed with pancreatic cancer in a population-based cohort of 2122 people over 50 years old [33]. Long-standing DM is a risk factor for pancreatic cancer, and there is indeed an increased incidence of development of pancreatic cancer among patients with long-standing DM [32, 34].

Preclinical studies have suggested that anti-diabetic medicine may influence the risk of cancer. Metformin, the most widely used oral anti-diabetic drug worldwide, might decrease the risk and mortality of cancer in patients with DM and therefore has facilitated numerous preclinical and clinical studies to investigate its anticancer activity [35–37]. Most proposed mechanisms of metformin can be attributed to inhibiting respiratory complex I of the mitochondria, thereby reducing oxidative phosphorylation, ATP production and ROS production in cells [38–42]. This in turn triggers the activation of adenosine monophosphate-activated protein kinase (AMPK), a cellular “energy thermostat” that plays a key role in regulating energy metabolism [43]. Anticancer role of metformin was related to the activation of AMPK and consequent inhibition of the mammalian target of rapamycin (mTOR) pathways that are frequently present in malignant cells [44–48]. In addition, it has been shown that metformin can inhibit pancreatic tumor growth in

obese, prediabetic mice through inhibiting transforming growth factor-beta (TGF-beta), epithelial-to-mesenchymal transition (EMT) and regulating expression of Notch in pancreatic cancer cells via targeted binding of miR-34a [49]. Although the mechanisms by which metformin influences tumor growth have recently been reviewed, it is uncertain whether the use of metformin can lead to better clinical outcomes for PC patients concurrent with DM.

Several studies have reported that patients receiving metformin show a significantly increased survival compared with breast, ovarian cancer patients with DM without metformin treatment [50–52]. Retrospective studies comparing survival outcomes between metformin and non-metformin treatment in PC patients with DM have appeared up to 2012. In our meta-analysis the included patients have concurrent pancreatic cancer and DM, avoiding diabetes itself as a confounder. We selected OS, which has been the gold standard for demonstrating benefit of clinical medicine as endpoints. We designed a comprehensive search strategy and examined relevant resources to retrieve potentially eligible trials. A total of 9318 patients with pancreatic cancer and concurrent type 2 diabetes were included in the meta-analysis. We found that metformin use is associated with a decreased mortality of PC. Compared with non-metformin treatment,



**Figure 2: Forest plot (random effects model) of pooled Hazard ratios(HRs) of overall survival by metformin versus non-metformin treatment.** Each study is shown by the point estimate of the HR (the size of the square is proportional to the weight of each study) and 95% CI for the HR (extending lines). The diamond represents the summary HR and 95% CI.

**Table 2: Pooled analysis of association of metformin use and survival of PC concurrent with DM**

|                              | N  | Sample size | HR                         | $P_h$ | $I^2$ |
|------------------------------|----|-------------|----------------------------|-------|-------|
| <b>Total</b>                 | 10 | 9318        | <b>0.84</b><br>(0.73-0.96) | 0.006 | 60.8% |
| <b>Country</b>               |    |             |                            |       |       |
| Asian                        | 3  | 544         | <b>0.65(0.52-0.80)</b>     | 0.83  | 0.0%  |
| Western                      | 7  | 8774        | 0.90(0.78-1.03)            | 0.028 | 57.6% |
| <b>Quality</b>               |    |             |                            |       |       |
| High                         | 7  | 8495        | <b>0.81(0.70-0.95)</b>     | 0.012 | 63.3% |
| Low                          | 3  | 823         | 0.88(0.60-1.29)            | 0.67  | 63.1% |
| <b>Exposure</b>              |    |             |                            |       |       |
| Before PC diagnose           | 3  | 4740        | 1.00(0.81-1.24)            | 0.1   | 56.6% |
| After PC diagnose            | 3  | 2359        | 0.76(0.52-1.11)            | 0.028 | 72.0% |
| <b>Publication bias test</b> |    |             |                            |       |       |
| Begg's test                  |    | $p=1.00$    |                            |       |       |
| Egger's test                 |    | $p=0.896$   |                            |       |       |

$P_h$ :  $P$  for heterogeneity.



**Figure 3: Funnel Plots to detect publication bias.** Each circle represents an individual article. HR indicates Hazard ratio. Circle represents identified studies.

metformin treatment with an OS benefit was equipped with a 14% reduction of death in the patients (HR 0.84; 95% CI: 0.73 – 0.96). This result was also supported by our subgroup analysis demonstrating significant difference in high quality studies (HR 0.81; 95% CI: 0.70 – 0.95) and Asian countries (HR 0.65; 95% CI: 0.52 – 0.80). Although our meta-analysis shows that the use of metformin is associated with an increase of pancreatic cancer survival among Asian individuals, we found no such association in Western countries. The differences observed in Asian countries against the Western countries could be attributed to differences in diet and life styles. In addition, Asian subjects, possibly attributable to having increased insulin resistance, hyperinsulinemia and central obesity, might benefit from several of the putative benefits of metformin therapy [53]. Together, these factors might lead to the different effects of metformin on PC patients in Asian and Western groups.

With respect to survival, the disregard of the initiation time of metformin use may bring about unintended biases, leading to the over estimation of the drug's effect. We perform subgroup analysis by initiation time of metformin use, of 9 eligibly articles, 5 cohorts [17, 18, 20, 22, 25] examined the impact of metformin use classification on survival. The results suggested that metformin use either before or after PC diagnose also has no significant benefit in survival (HR 1.00; 95% CI: 0.81 – 1.24; HR 0.76; 95% CI: 0.52 – 1.11). The results from these studies might be affected by inadequate statistical power, because they had only limited sample size in the subgroups and are prone to incomplete information about the initiation time of metformin use.

There are several limitations inherent to our meta-analysis of the published studies. First, according to NOS, three comparisons were assessed as low quality, thus restricting the interpretation of the results. Subgroup analysis show that metformin use lost significant benefit in 3 low quality publications. On the other hand, high quality studies confirmed the findings of metformin benefit. Second, following the criteria, we included only a limited number of trials (n=9). The low number of included articles weakens the validity of our results. Third, the reported meta-analysis was limited by substantial heterogeneity among the studies ( $p$ .006 for heterogeneity;  $I^2$  60.8%). Subgroup and sensitivity analyses were performed to evaluate the effect of potential effect modifiers. The high heterogeneity of results is probably because the populations used in studies were from various countries. Lastly, the results may be influenced by the different levels and durations of metformin exposure. It is extremely difficult to determine the beneficial dose and duration of metformin for improved survival because few studies have provided the related information.

Based on the meta-analysis results, our study demonstrates that metformin use in individuals with PC and concurrent type 2 DM can increase OS compared with

those without the use of metformin. Our results suggest that metformin might be the anti-diabetic medicine of choice in patients with pancreatic cancer and concurrent type 2 DM.

## MATERIALS AND METHODS

### Study selection

Two researchers independently conducted a systematic literature search to identify studies that investigated treatment of PC patients with DM with metformin. All relevant articles of English language published before August 2016 were identified from PubMed and Web of Science. The search terms used were “metformin”, “diabetes”, “prognosis or survival or mortality” and “pancreatic cancer or neoplasm or carcinoma or adenocarcinoma or tumor”. We reviewed all articles and potential studies referenced for additional consideration. In addition, we searched all relevant review articles.

Studies included in this meta-analysis should meet the following criteria: 1) they contained hazard ratios (HR) and 95% CI about survival or mortality of disease; 2) they included randomized, controlled trials (RCTs); and 3) they also included observational studies. Exclusion criteria were: 1) no data about survival parameters in the abstract; and 2) *in vitro* or animal studies.

### Data extraction and quality assessment

Data extraction from text, tables, and figures of included studies was carried out independently by two investigators (Zhou PT and Li B) using standardized forms. Discrepancies were resolved by consensus in consultation with the third author (Li D). A quality assessment of the studies was performed to understand the bias in individual studies. The methodological quality of the observational studies was assessed by two authors independently (Zhou PT and Li B) using the Newcastle – Ottawa scale [54].

### Data analyses

We compared the outcomes of ratios in patients treated with metformin versus a control group (placebo or other anti-diabetics medication). For the network meta-analysis of overall survival data, we applied a random-effect to calculate the HR estimates and 95% CI as previously described [55]. Subgroup analyses were conducted for country location of the studies, article quality and history of metformin used in patients.

We evaluated the between-study heterogeneity using a Cochran Q test, with a  $p$ -value <0.10. We also operate heterogeneity with  $I^2$  test and we considered  $I^2$ <30% as representing low statistical heterogeneity and  $I^2$ > 75% as representing high statistical heterogeneity [56].

We investigated the publication bias for our meta-analysis by using a funnel plot and the asymmetry by using Begg and Egger tests [57, 58]. Finally, we performed sensitivity analysis by removing each study at a time to evaluate the stability of the results. All analyses were performed using Stata version 12.0 software (StataCorp, College Station, TX).

## ACKNOWLEDGMENTS

This work was supported by National Natural Science Foundation of China (grant 81370600); The Program for Professor of Special Appointment (Eastern Scholar) at Shanghai Institutions of Higher Learning(TP2015022) and Shanghai Pujiang Program (15PJ1404800).

## CONFLICTS OF INTEREST

The authors declare no conflicts of interest.

## REFERENCES

1. Siegel R, Naishadham D, Jemal A. Cancer statistics, 2013. *CA Cancer J Clin.* 2013; 63:11-30.
2. B. S, Smith G, Hurria A, Hortobagyi G, Buchholz T. Future of cancer incidence in the United States: burdens upon an aging, changing nation. *Journal of clinical oncology.* 2009; 27:2758-2765.
3. Schneider G, Siveke JT, Eckel F, Schmid RM. Pancreatic cancer: basic and clinical aspects. *Gastroenterology.* 2005; 128:1606-1625.
4. Li D, Xie K, Wolff R, Abbruzzese JL. Pancreatic cancer. *Lancet.* 2004; 363:1049-1057.
5. Siegel R, Naishadham D, Jemal A. Cancer statistics, 2012. *CA Cancer J Clin.* 2012; 62:10-29.
6. Yeo CJ, Cameron JL, Sohn TA, Lillemoe KD, Pitt HA, Talamini MA, Hruban RH, Ord SE, Sauter PK, Coleman J, Zahurak ML, Grochow LB, Abrams RA. Six hundred fifty consecutive pancreaticoduodenectomies in the 1990s: pathology, complications, and outcomes. *Annals of surgery.* 1997; 226:248-257; discussion 257-260.
7. Nitecki SS, Sarr MG, Colby TV, van Heerden JA. Long-term survival after resection for ductal adenocarcinoma of the pancreas. Is it really improving? *Annals of surgery.* 1995; 221:59-66.
8. Maisonneuve P, Lowenfels AB. Epidemiology of pancreatic cancer: an update. *Digestive diseases.* 2010; 28:645-656.
9. Yuan C, Rubinson DA, Qian ZR, Wu C, Kraft P, Bao Y, Ogino S, Ng K, Clancy TE, Swanson RS, Gorman MJ, Brais LK, Li T, et al. Survival among patients with pancreatic cancer and long-standing or recent-onset diabetes mellitus. *Journal of clinical oncology.* 2015; 33:29-35.
10. Batabyal P, Vander Hoorn S, Christophi C, Nikfarjam M. Association of diabetes mellitus and pancreatic adenocarcinoma: a meta-analysis of 88 studies. *Annals of surgical oncology.* 2014; 21:2453-2462.
11. Li D, Yeung SC, Hassan MM, Konopleva M, Abbruzzese JL. Antidiabetic therapies affect risk of pancreatic cancer. *Gastroenterology.* 2009; 137:482-488.
12. Bodmer M, Meier C, Krahenbuhl S, Jick SS, Meier CR. Long-term metformin use is associated with decreased risk of breast cancer. *Diabetes care.* 2010; 33:1304-1308.
13. Tseng CH. Metformin reduces gastric cancer risk in patients with type 2 diabetes mellitus. *Aging (Albany NY).* 2016; 8:1636-1649. doi: 10.18632/aging.101019.
14. Bodmer M, Becker C, Meier C, Jick SS, Meier CR. Use of metformin and the risk of ovarian cancer: a case-control analysis. *Gynecologic oncology.* 2011; 123:200-204.
15. Yin M, Zhou J, Gorak EJ, Quddus F. Metformin is associated with survival benefit in cancer patients with concurrent type 2 diabetes: a systematic review and meta-analysis. *The oncologist.* 2013; 18:1248-1255.
16. Wang Z, Lai ST, Xie L, Zhao JD, Ma NY, Zhu J, Ren ZG, Jiang GL. Metformin is associated with reduced risk of pancreatic cancer in patients with type 2 diabetes mellitus: a systematic review and meta-analysis. *Diabetes research and clinical practice.* 2014; 106:19-26.
17. Amin S, Mhango G, Lin J, Aronson A, Wisnivesky J, Boffetta P, Lucas AL. Metformin Improves Survival in Patients with Pancreatic Ductal Adenocarcinoma and Pre-Existing Diabetes: A Propensity Score Analysis. *The American journal of gastroenterology.* 2016.
18. Chaiteerakij R, Petersen GM, Bamlet WR, Chaffee KG, Zhen DB, Burch PA, Leof ER, Roberts LR, Oberg AL. Metformin Use and Survival of Patients With Pancreatic Cancer: A Cautionary Lesson. *Journal of clinical oncology.* 2016; 34:1898-1904.
19. Ambe CM, Mahipal A, Fulp J, Chen L, Malafa MP. Effect of Metformin Use on Survival in Resectable Pancreatic Cancer: A Single-Institution Experience and Review of the Literature. *PloS one.* 2016; 11:e0151632.
20. Lee SH, Yoon SH, Lee HS, Chung MJ, Park JY, Park SW, Song SY, Chung JB, Bang S. Can metformin change the prognosis of pancreatic cancer? Retrospective study for pancreatic cancer patients with pre-existing diabetes mellitus type 2. *Digestive and liver disease.* 2016; 48:435-440.
21. Choi Y, Kim TY, Oh DY, Lee KH, Han SW, Im SA, Kim TY, Bang YJ. The Impact of Diabetes Mellitus and Metformin Treatment on Survival of Patients with Advanced Pancreatic Cancer Undergoing Chemotherapy. *Cancer research and treatment.* 2016; 48:171-179.
22. Hwang AL, Haynes K, Hwang WT, Yang YX. Metformin and survival in pancreatic cancer: a retrospective cohort study. *Pancreas.* 2013; 42:1054-1059.

23. Nakai Y, Isayama H, Sasaki T, Mizuno S, Sasahira N, Kogure H, Kawakubo K, Yamamoto N, Hirano K, Ijichi H, Tateishi K, Tada M, Koike K. Clinical outcomes of chemotherapy for diabetic and nondiabetic patients with pancreatic cancer: better prognosis with statin use in diabetic patients. *Pancreas*. 2013; 42:202-208.
24. Sadeghi N, Abbruzzese JL, Yeung SC, Hassan M, Li D. Metformin use is associated with better survival of diabetic patients with pancreatic cancer. *Clinical cancer research*. 2012; 18:2905-2912.
25. Currie CJ, Poole CD, Jenkins-Jones S, Gale EA, Johnson JA, Morgan CL. Mortality after incident cancer in people with and without type 2 diabetes: impact of metformin on survival. *Diabetes care*. 2012; 35:299-304.
26. Jo A, Kim Y, Kang S, Kim M, Ko M. The Effect Of Metformin Use And Mortality Among Those With Pancreatic Cancer And Type 2 Diabetes Mellitus: Findings From A Nationwide Population Retrospective Cohort Study. *Value in health*. 2015; 18:A439.
27. Reni M, Dugnani E, Cereda S, Belli C, Balzano G, Nicoletti R, Liberati D, Pasquale V, Scavini M, Maggiora P, Sordi V, Lampasona V, Ceraulo D, et al. (Ir)relevance of Metformin Treatment in Patients with Metastatic Pancreatic Cancer: An Open-Label, Randomized Phase II Trial. *Clinical cancer research*. 2016; 22:1076-1085.
28. Kordes S, Pollak MN, Zwinderman AH, Mathot RA, Weterman MJ, Beeker A, Punt CJ, Richel DJ, Wilmink JW. Metformin in patients with advanced pancreatic cancer: a double-blind, randomised, placebo-controlled phase 2 trial. *The Lancet Oncology*. 2015; 16:839-847.
29. Gullo L. Diabetes and the risk of pancreatic cancer. *Annals of oncology*. 1999; 10:79-81.
30. Pannala R, Leirness JB, Bamlet WR, Basu A, Petersen GM, Chari ST. Prevalence and clinical profile of pancreatic cancer-associated diabetes mellitus. *Gastroenterology*. 2008; 134:981-987.
31. Wang F, Herrington M, Larsson J, Permert J. The relationship between diabetes and pancreatic cancer. *Molecular cancer*. 2003; 2:4.
32. Huxley R, Ansary-Moghaddam A, Berrington de Gonzalez A, Barzi F, Woodward M. Type-II diabetes and pancreatic cancer: a meta-analysis of 36 studies. *British journal of cancer*. 2005; 92:2076-2083.
33. Senior K. Late-onset diabetes and the link with pancreatic cancer. *The Lancet Oncology*. 2005; 6:641.
34. Chari ST, Leibson CL, Rabe KG, Ransom J, de Andrade M, Petersen GM. Probability of pancreatic cancer following diabetes: a population-based study. *Gastroenterology*. 2005; 129:504-511.
35. Aung KL, Moore MJ. Metformin for pancreatic cancer. *The Lancet Oncology*. 2015; 16:748-749.
36. Ma SJ, Zheng YX, Zhou PC, Xiao YN, Tan HZ. Metformin use improves survival of diabetic liver cancer patients: systematic review and meta-analysis. *Oncotarget*. 2016; 7:66202-66211. doi: 10.18632/oncotarget.11033.
37. Wan G, Yu X, Chen P, Wang X, Pan D, Wang X, Li L, Cai X, Cao F. Metformin therapy associated with survival benefit in lung cancer patients with diabetes. *Oncotarget*. 2016; 7:35437-45. doi: 10.18632/oncotarget.8881.
38. Viollet B, Guigas B, Sanz Garcia N, Leclerc J, Foretz M, Andreelli F. Cellular and molecular mechanisms of metformin: an overview. *Clin Sci (Lond)*. 2012; 122:253-270.
39. Picone P, Vilasi S, Librizzi F, Contardi M, Nuzzo D, Caruana L, Baldassano S, Amato A, Mule F, San Biagio PL, Giacomazza D, Di Carlo M. Biological and biophysics aspects of metformin-induced effects: cortex mitochondrial dysfunction and promotion of toxic amyloid pre-fibrillar aggregates. *Aging (Albany NY)*. 2016; 8:1718-1734. doi: 10.18632/aging.101004.
40. Moiseeva O, Deschenes-Simard X, Pollak M, Ferbeyre G. Metformin, aging and cancer. *Aging (Albany NY)*. 2013; 5:330-331. doi: 10.18632/aging.100556.
41. Gui DY, Sullivan LB, Luengo A, Hosios AM, Bush LN, Gitego N, Davidson SM, Freinkman E, Thomas CJ, Vander Heiden MG. Environment Dictates Dependence on Mitochondrial Complex I for NAD<sup>+</sup> and Aspartate Production and Determines Cancer Cell Sensitivity to Metformin. *Cell Metab*. 2016; 24:716-727.
42. Liu X, Romero IL, Litchfield LM, Lengyel E, Locasale JW. Metformin Targets Central Carbon Metabolism and Reveals Mitochondrial Requirements in Human Cancers. *Cell Metab*. 2016; 24:728-739.
43. Hardie DG. AMP-activated protein kinase: a cellular energy sensor with a key role in metabolic disorders and in cancer. *Biochem Soc Trans*. 2011; 39:1-13.
44. Zhou G, Myers R, Li Y, Chen Y, Shen X, Fenyk-Melody J, Wu M, Ventre J, Doebber T, Fujii N, Musi N, Hirshman MF, Goodyear LJ, Moller DE. Role of AMP-activated protein kinase in mechanism of metformin action. *The Journal of clinical investigation*. 2001; 108:1167-1174.
45. Ben Sahra I, Laurent K, Loubat A, Giorgetti-Peraldi S, Colosetti P, Auberger P, Tanti JF, Le Marchand-Brustel Y, Bost F. The antidiabetic drug metformin exerts an antitumoral effect *in vitro* and *in vivo* through a decrease of cyclin D1 level. *Oncogene*. 2008; 27:3576-3586.
46. Blandino G, Valerio M, Cioce M, Mori F, Casadei L, Pulito C, Sacconi A, Biagioni F, Cortese G, Galanti S, Manetti C, Citro G, Muti P, Strano S. Metformin elicits anticancer effects through the sequential modulation of DICER and c-MYC. *Nature communications*. 2012; 3:865.
47. Anisimov VN. Metformin and rapamycin are master-keys for understanding the relationship between cell senescent, aging and cancer. *Aging (Albany NY)*. 2013; 5:337-338. doi: 10.18632/aging.100561.
48. Wu L, Zhou B, Oshiro-Rapley N, Li M, Paulo JA, Webster CM, Mou F, Kacergis MC, Talkowski ME, Carr CE, Gygi

- SP, Zheng B, Soukas AA. An Ancient, Unified Mechanism for Metformin Growth Inhibition in *C. elegans* and Cancer. *Cell*. 2016; 167:1705-1718 e1713.
49. Cifarelli V, Lashinger LM, Devlin KL, Dunlap SM, Huang J, Kaaks R, Pollak MN, Hursting SD. Metformin and Rapamycin Reduce Pancreatic Cancer Growth in Obese Prediabetic Mice by Distinct MicroRNA-Regulated Mechanisms. *Diabetes*. 2015; 64:1632-1642.
50. Jiralerspong S, Palla SL, Giordano SH, Meric-Bernstam F, Liedtke C, Barnett CM, Hsu L, Hung MC, Hortobagyi GN, Gonzalez-Angulo AM. Metformin and pathologic complete responses to neoadjuvant chemotherapy in diabetic patients with breast cancer. *Journal of clinical oncology*. 2009; 27:3297-3302.
51. Koo YX, Tan DS, Tan IB, Tai DW, Ha T, Ong WS, Quek R, Tao M, Lim ST. Effect of concomitant statin, metformin, or aspirin on rituximab treatment for diffuse large B-cell lymphoma. *Leukemia & lymphoma*. 2011; 52:1509-1516.
52. Kumar S, Meuter A, Thapa P, Langstraat C, Giri S, Chien J, Rattan R, Cliby W, Shridhar V. Metformin intake is associated with better survival in ovarian cancer: a case-control study. *Cancer*. 2013; 119:555-562.
53. Nagi DK, Yudkin JS. Effects of metformin on insulin resistance, risk factors for cardiovascular disease, and plasminogen activator inhibitor in NIDDM subjects. A study of two ethnic groups. *Diabetes care*. 1993; 16:621-629.
54. Wells GASB OCD, Peterson J, Welch V, Losos M, Tugwell P. The Newcastle-Ottawa Scale (NOS) for assessing the quality of nonrandomised studies in meta-analyses. Available from: [http://www/ohrica/programs/clinical\\_epidemiology/oxfordhtm](http://www/ohrica/programs/clinical_epidemiology/oxfordhtm). cited 5 May 2012.
55. Woods BS, Hawkins N, Scott DA. Network meta-analysis on the log-hazard scale, combining count and hazard ratio statistics accounting for multi-arm trials: a tutorial. *BMC medical research methodology*. 2010; 10:54.
56. Kanwal F, White D. "Systematic Reviews and Meta-analyses" in *Clinical Gastroenterology and Hepatology*. *Clinical gastroenterology and hepatology*. 2012; 10:1184-1186.
57. Begg CB, Mazumdar M. Operating characteristics of a rank correlation test for publication bias. *Biometrics*. 1994; 50:1088-1101.
58. Egger M, Davey Smith G, Schneider M, Minder C. Bias in meta-analysis detected by a simple, graphical test. *Bmj*. 1997; 315:629-634.
